# Supplementary material
Source: publisher site journal article supplement (http://apsnet.org/meetings/mtngwshops/NPDRS/Documents/2006/Appendix5.2.pdf)
Supplement: Supplementary file 1 [file Appendix5.2.pdf]

| Pathogen                                                                                                 | Establishment possible | Pathway exists | Economic effect (Direct or trade) | Public costs | Total (Don't know = 0) | Recovery applicable and useful |                              |                                     |                                                                                                                                                                |
|----------------------------------------------------------------------------------------------------------|------------------------|----------------|-----------------------------------|--------------|------------------------|--------------------------------|------------------------------|-------------------------------------|----------------------------------------------------------------------------------------------------------------------------------------------------------------|
| Phytophthora mix (write for SOD, include info on kernoviae, alni, hedreana?)                             | 3                      | 3              | 3                                 | 3            | 12                     | Y                              | ok                           |                                     |                                                                                                                                                                |
| TYLCV (Tomato Yellow Leaf Curl Virus; Israel type isolate Q biotype)                                     | 3                      | 3              | 3                                 | 3            | 12                     | Y (all spp)                    | ok                           | Judy                                | emerging                                                                                                                                                       |
| Guignardia citrocarpa Black spot of citrus                                                               | 3                      | 3              | 3                                 | 3            | 12                     | Y                              | ok                           | Gail                                | trade                                                                                                                                                          |
| Elsinoe austialis Sweet orange scab                                                                      | 3                      | 2              | 3                                 | 3            | 11                     | Y                              | ok                           | Gail                                | trade; present in South America; wind, lots of chemicals                                                                                                       |
| Cephalosporium maydis Late wilt of corn                                                                  | 2                      | 2              | 3                                 | 3            | 10                     | Y                              |                              |                                     | seed transmitted                                                                                                                                               |
| Heterodera latipons                                                                                      | 3                      | 2              | 2                                 | 2            | 9                      | N                              | ok                           | Kim                                 |                                                                                                                                                                |
| Citrus leprosis virus                                                                                    |                        |                |                                   |              |                        |                                | ok                           | Gail                                | Central and South America; whiteflies persistent; control available; pathway on ornamentals citrus (very high-mites); direct and trade (fruit)economic effects |
| Phaeoramularia fruit and leaf spot (citrus)                                                              | 3                      | 2              | 2                                 | 2            | 9                      | Y                              | ok                           | Gail                                |                                                                                                                                                                |
| Dactuliochaeta glycines (Red Leaf Blotch; maybe a Phoma now; sclerotial state Dactuliochaeta glycines; ) | 1                      | 2              | 3                                 | 3            | 9                      | ?                              | ok                           | Doug                                | direct                                                                                                                                                         |
| Candidatus Phytoplasma mali (Apple proliferation; Apple Witches' Broom)                                  | 2                      | 1              | 3                                 | 3            | 9                      | Y                              | ok                           | Anne                                | grafting, leafhopper, nursery stock                                                                                                                            |
| Rathayibacter toxicus (Gumming Disease of Grasses; annual ryegrass toxicity; ryegrass staggers)          | 2                      | 2              | 2                                 | 2            | 8                      | Y                              | ok                           | Anne                                | seed pathway                                                                                                                                                   |
|                                                                                                          | 1                      | 3              | 2                                 | 1            | 7                      | Y                              |                              |                                     |                                                                                                                                                                |
| Cowpea Mild Mottle Virus (Brazil Soy Virus)                                                              | 3/0                    | 3              | ?                                 | ?            | 3                      |                                | not enough info              | Sue; whitefly transmitted           | not widespread in Brazil                                                                                                                                       |
| Thrips transmitted viruses                                                                               |                        |                |                                   |              | 0                      |                                | not rate, consider for plans | Gail                                |                                                                                                                                                                |
| Xylophilus ampelinus (Canker of grapevine)                                                               |                        |                |                                   |              | 0                      |                                | not enough info on lifecycle | Anne                                |                                                                                                                                                                |
| Sudden Death Syndrome of Citrus (cause unknown)                                                          |                        |                |                                   |              | 0                      |                                | not enough info              | Gail                                |                                                                                                                                                                |
| Acidovorax avenae ssp. avenae (Mesothermophilus oryzae, proposed)                                        |                        |                |                                   |              | 0                      |                                | not enough info              | Anne                                |                                                                                                                                                                |
| Bacterial Brown Stripe of Rice                                                                           |                        |                |                                   |              | 0                      |                                |                              |                                     |                                                                                                                                                                |
| Eastern Filbert Blight                                                                                   |                        |                |                                   |              | 0                      |                                | minor c                      | Bob                                 |                                                                                                                                                                |
| Xylella fastidiosa CVC                                                                                   |                        |                |                                   |              | 0                      |                                | done                         | Gail                                |                                                                                                                                                                |
| SOD                                                                                                      | visit on Friday        |                |                                   |              | 0                      |                                | covered above                | Gail/Bob                            |                                                                                                                                                                |
| Phytophthora kernoviae (see above)                                                                       |                        |                |                                   |              | 0                      |                                |                              | Russ                                | Phytosanitary Alert System                                                                                                                                     |
| Phytophthora alni (see above)                                                                            |                        |                |                                   |              | 0                      |                                |                              | Kim                                 |                                                                                                                                                                |
| Emerging Tospoviruses Geminiviruses Begomoviruses                                                        |                        |                |                                   |              | 0                      |                                |                              | Gail                                | chili thrips                                                                                                                                                   |
| Blackberry Rust (Phragmidium violaceum?)                                                                 |                        |                |                                   |              | 0                      |                                |                              | Bob                                 |                                                                                                                                                                |
| Hop Powdery Mildew (Podosphaera macularis)                                                               |                        |                |                                   |              | 0                      |                                |                              | Bob                                 |                                                                                                                                                                |
| Iris Yellow Spot in Onion (Tospovirus)                                                                   |                        |                |                                   |              | 0                      |                                |                              | Bob; thrips transmitted             |                                                                                                                                                                |
| Strawberry Decline (Virus complex)                                                                       |                        |                |                                   |              | 0                      |                                |                              | Bob; whitefly and aphid transmitted |                                                                                                                                                                |
| Raspberry Bushy Dwarf Virus                                                                              |                        |                |                                   |              | 0                      |                                |                              | Bob                                 |                                                                                                                                                                |
| Black Raspberry Decline Virus                                                                            |                        |                |                                   |              | 0                      |                                |                              | Bob                                 |                                                                                                                                                                |
| Blackberry Yellow Vein Disease (whitefly/Potyvirus complex)                                              |                        |                |                                   |              | 0                      |                                |                              | Bob                                 |                                                                                                                                                                |
| Blueberry Scorch Disease                                                                                 |                        |                |                                   |              | 0                      |                                |                              | Bob                                 |                                                                                                                                                                |
| Candidatus Phlomobacter fragariae (Marginal chlorosis of strawberry)                                     |                        |                |                                   |              | 0                      |                                |                              | Anne                                |                                                                                                                                                                |
| Glasshouse ornamentals (based on production)                                                             |                        |                |                                   |              | 0                      |                                |                              |                                     |                                                                                                                                                                |
|                                                                                                          |                        |                |                                   |              | 0                      |                                |                              |                                     |                                                                                                                                                                |
| Aphid transmitted viruses                                                                                |                        |                |                                   |              |                        |                                | not rate, consider for plans |                                     |                                                                                                                                                                |
| Whitefly transmitted viruses                                                                             |                        |                |                                   |              |                        |                                | not rate, consider for plans |                                     |                                                                                                                                                                |
| Citrus canker (new strains)                                                                              |                        |                |                                   |              |                        |                                | not rate, CHRP should cover  | Gail                                |                                                                                                                                                                |
